# Supplementary material for: Detection of Sensitization Profiles with Cellular In Vitro Tests in Wheat Allergy Dependent on Augmentation Factors (WALDA)
Source: MDPI journal article supplement (doi:10.3390/ijms25073574), 2024-03-22
Supplement: s1 [file s1]

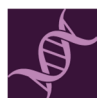

# Detection of Sensitization Profiles with Cellular In Vitro Tests in Wheat Allergy Dependent on Augmentation Factors (WALDA)

Valentina Faihs <sup>1</sup>, Viktoria Schmalhofer <sup>1</sup>, Claudia Kugler <sup>1</sup>, Rebekka K. Bent <sup>1</sup>, Katharina A. Scherf <sup>2</sup>, Barbara Lexhaller <sup>2</sup>, Charlotte G. Mortz <sup>3</sup>, Carsten Bindslev-Jensen <sup>3</sup>, Tilo Biedermann <sup>1</sup>, Per S. Skov <sup>3,4</sup>, Bernadette Eberlein <sup>1</sup> and Knut Brockow <sup>1,3,\*</sup>

<sup>1</sup> Department of Dermatology and Allergy Biederstein, School of Medicine and Health, Technical University of Munich, 80802 Munich, Germany

<sup>2</sup> Department of Bioactive and Functional Food Chemistry, Institute of Applied Biosciences, Karlsruhe Institute of Technology (KIT), 76131 Karlsruhe, Germany

<sup>3</sup> Odense Research Center for Anaphylaxis (ORCA), Department of Dermatology and Allergy Centre, Odense University Hospital, 5000 Odense, Denmark

<sup>4</sup> RefLab ApS, 2200 Copenhagen, Denmark

\* Correspondence: knut.brockow@tum.de; Tel.: +49-894140-3069; Fax: +49-894140-3576

## Supplementary material

Table S1. Clinical characteristics of WALDA patients and healthy controls.

| Clinical characteristics                          | WALDA patients, n=13                                                                                                                      | Controls, n=11            | p-value |
|---------------------------------------------------|-------------------------------------------------------------------------------------------------------------------------------------------|---------------------------|---------|
| Age, median (range)                               | 54 years (32-83)                                                                                                                          | 32 years (25-67)          | <0.05   |
| Sex, male/female, n (%)                           | 8/5 (61.5%/38.5%)                                                                                                                         | 5/6 (54.5%/45.5%)         | n.s.    |
| Any self-reported atopic comorbidities, n (%)     | 3 (23%)                                                                                                                                   | 6 (54.5%)                 | n.s.    |
| Total IgE, median (range)                         | 234 kU/l (52.4-2848)                                                                                                                      | 59.7 kU/l (3.69-488)      | <0.05   |
| sIgE to $\omega$ 5-gliadin, median (range)        | 5.40 kU/l (2.32-28.4)                                                                                                                     | <0.1 kU/l                 | <0.001  |
| sIgE to wheat, median (range)                     | 0.51 kU/l (<0.1-4.65)                                                                                                                     | 0.12 kU/l (<0.1-1.19)     | n.s.    |
| sIgE to wheat gluten, median (range)              | 1.77 kU/l (0.13-9.95)                                                                                                                     | <0.1 kU/l (<0.1-0.3)      | <0.001  |
| sIgE to gliadins, median (range)                  | 1.44 kU/l (<0.1-10.3)                                                                                                                     | <0.1 kU/l                 | <0.001  |
| sIgE to rTri a 14 wheat, median (range)           | <0.1 kU/l (<0.1-0.12)                                                                                                                     | <0.1 kU/l                 | n.s.    |
| Positive SPT with wheat flour, n (%)              | 12 (92.3%)                                                                                                                                | 0 (0%)                    | <0.001  |
| Positive SPT with wheat gluten, n (%)             | 12 (92.3%)                                                                                                                                | 1 (0.9%)                  | <0.001  |
| Basal serum tryptase, median (range)              | 4.31 $\mu$ g/l (3.01-6.66)                                                                                                                | 2.75 $\mu$ g/l (0.4-11.7) | n.s.    |
| Oral challenge test reaction threshold*,<br>n (%) | 1) 3 (23%)<br>2) 0 (0%)<br>3) 3 (23%)<br>4) 3 (23%)<br>5) 2 (15.4%)<br>6) 1 (7.7%)<br>7) 0 (0%)<br>8) 1 (7.7%)<br>9) 0 (0%)<br>10) 0 (0%) | -                         | -       |

\* see Methods section for grading. Abbreviations: sIgE, specific IgE; SPT, skin prick test.

**Table S2.** Overview of the results of cellular in vitro tests in WALDA patients and in healthy controls.

| In vitro test                                                                                                                  | Test substance | WALDA patients    | Controls       | p-value |
|--------------------------------------------------------------------------------------------------------------------------------|----------------|-------------------|----------------|---------|
| <b>BAT</b><br>%CD63+max in any concentration,<br>median (range)                                                                | Gluten         | 7.1 (1.2-64.8)    | 1.6 (0.4-3.7)  | <0.001  |
|                                                                                                                                | HMW-GS         | 10.7 (1.4-74.5)   | 1.0 (0.4-7.9)  | <0.001  |
|                                                                                                                                | ATI            | 10.7 (1.9-73.0)   | 1.6 (0.6-2.7)  | <0.001  |
|                                                                                                                                | Wheat beer     | 17.0 (1.0-87.4)   | 1.2 (0.2-22.5) | <0.001  |
|                                                                                                                                | eHWP           | 6.9 (1.7-88.6)    | 2.0 (1.0-3.6)  | <0.001  |
|                                                                                                                                | sHWP           | 12.3 (2.8-77.2)   | 1.6 (0.2-7.4)  | <0.001  |
|                                                                                                                                | Rye gluten     | 10.8 (0.8-89.7)   | 1.2 (0.6-6.2)  | 0.002   |
|                                                                                                                                | Rye secalins   | 10.5 (0.3-76.2)   | 1.2 (0.4-8.8)  | 0.004   |
| <b>aBHRA</b><br>maximum histamine release<br>(ng/ml) in any concentration,<br>median (range)                                   | Gluten         | 35.8 (11.5-73.5)  | n.d.           |         |
|                                                                                                                                | HMW-GS         | 35.3 (24.0-207.0) | n.d.           |         |
|                                                                                                                                | ATI            | 24.5 (6.5-40.0)   | n.d.           |         |
|                                                                                                                                | Wheat beer     | 38.3 (4.0-67.5)   | n.d.           |         |
|                                                                                                                                | eHWP           | 25.0 (1.5-54.0)   | n.d.           |         |
|                                                                                                                                | sHWP           | 44.0 (8.5-112.0)  | n.d.           |         |
|                                                                                                                                | Rye gluten     | 23.0 (7.0-71.5)   | n.d.           |         |
|                                                                                                                                | Rye secalins   | 31.8 (6.0-87.0)   | n.d.           |         |
| <b>pBHRA</b><br>maximum histamine release (ng/ml<br>exceeding the negative control) in<br>any concentration,<br>median (range) | Gluten         | <10.0 (3.3-46.5)  | 5.7            |         |
|                                                                                                                                | HMW-GS         | <10.0 (1.7-40.5)  | 5.0            |         |
|                                                                                                                                | ATI            | <10.0 (2.0-14.3)  | 2.3            |         |
|                                                                                                                                | Wheat beer     | <10.0 (7.0-34.0)  | 2.7            |         |
|                                                                                                                                | eHWP           | <10.0 (2.7-32.0)  | 2.3            |         |
|                                                                                                                                | sHWP           | <10.0 (5.3-33.3)  | 2.0            |         |
|                                                                                                                                | Rye secalins   | <10.0 (1.0-18.3)  | 0.0            |         |

Abbreviations: BAT, basophil activation test; aBHRA, active basophil histamine release assay; pBHRA, passive basophil histamine release assay; ATI,  $\alpha$ -amylase/trypsin inhibitors; HMW-GS, high-molecular-weight glutenin subunits; eHWP, extensively hydrolyzed wheat proteins; sHWP, slightly hydrolyzed wheat proteins.

| Control subject | slgE<br>ω5-<br>gliadin<br>(kU/l) | BAT    |                |      |        |                 |     |               |      |      |               | pBHRA    |        |              |     |               |      |      |          |
|-----------------|----------------------------------|--------|----------------|------|--------|-----------------|-----|---------------|------|------|---------------|----------|--------|--------------|-----|---------------|------|------|----------|
|                 |                                  | Blanks | Anti-<br>FcεRI | FMLP | Gluten | HMW-<br>GS      | ATI | Wheat<br>beer | eHWP | sHWP | Rye<br>gluten | Secalins | Gluten | HMW-<br>GS   | ATI | Wheat<br>Beer | eHWP | sHWP | Secalins |
| c 1             | <0.1                             | 0.2    | 79.2           | 42.2 | 0.4    | 0.8             | 0.6 | 0.8           | 1.6  | 0.2  | 0.6           | 1.2      |        |              |     |               |      |      |          |
| c 2             |                                  | 0.9    | 84.4           | 38.0 | 0.6    | 0.8             | 1.4 | 1.4           | 2.2  | 2.9  |               |          | 5.7    | 5.0          | 2.3 | 2.7           | 2.3  | 2.0  | 0.0      |
| c 3             |                                  | 0.4    | 19.4           | 16.2 | 0.6    | 0.4             | 1.6 | 0.2           | 1.0  | 0.4  | 0.6           | 2.4      |        |              |     |               |      |      |          |
| c 4             |                                  | 0.8    | 85.6           | 23.2 | 1.8    | 1.2             | 2.0 | 1.2           | 3.4  | 1.4  | 1.0           | 1.4      |        |              |     |               |      |      |          |
| c 5             |                                  | 1.4    | 62.0           | 17.2 | 3.4    | 2.2             | 1.2 | 2.4           | 3.6  | 7.4  | 6.2           | 1.7      |        |              |     |               |      |      |          |
| c 6             |                                  | 1.3    | 92.3           | 4.7  | 0.6    | 0.8             | 2.6 | 2.2           | 1.2  | 1.4  | 1.6           | 1.2      |        |              |     |               |      |      |          |
| c 7             |                                  | 0.8    | 53.2           | 13.6 | 2.4    | 1.0             | 2.1 | 2.5           | 2.1  | 0.6  | 1.2           | 0.6      |        |              |     |               |      |      |          |
| c 8             |                                  | 1.0    | 82.1           | 70.3 | 3.7    | 0.5             | 1.1 | 0.9           | 1.2  | 4.2  | 1.0           | 0.6      |        |              |     |               |      |      |          |
| c 9             |                                  | 0.4    | 86.8           | 10.8 | 1.7    | 7.9             | 2.7 | 22.5          | 1.4  | 1.7  | 3.4           | 0.6      |        |              |     |               |      |      |          |
| c 10            |                                  | 0.4    | 40.7           | 44.6 | 1.0    | 1.8             | 2.6 | 0.4           | 2.4  | 2.2  | 1.2           | 0.4      |        |              |     |               |      |      |          |
| c 11            |                                  | 1.5    | 52.0           | 13.5 | 1.6    | 4.0             | 1.4 | 1.2           | 2.0  | 1.6  | 1.6           | 8.8      |        |              |     |               |      |      |          |
|                 |                                  |        |                |      |        | Legend BAT      |     |               |      |      |               |          |        | Legend pBHRA |     |               |      |      |          |
|                 |                                  |        |                |      |        | <3 %CD36+max    |     |               |      |      |               |          |        | <10 ng/ml    |     |               |      |      |          |
|                 |                                  |        |                |      |        | 3-14 %CD36+max  |     |               |      |      |               |          |        | 10-24 ng/ml  |     |               |      |      |          |
|                 |                                  |        |                |      |        | 15-49 %CD36+max |     |               |      |      |               |          |        | 25-49 ng/ml  |     |               |      |      |          |
|                 |                                  |        |                |      |        | >50 %CD36+max   |     |               |      |      |               |          |        | >50 ng/ml    |     |               |      |      |          |
|                 |                                  |        |                |      |        | not done        |     |               |      |      |               |          |        | not done     |     |               |      |      |          |

**Figure S1.** Overview of the *in vitro* basophil tests BAT and pBHRA in healthy controls. For the BAT, data are shown as maximum values of %CD63+ basophils in any concentration of the respective test substance (%CD63+max). Anti-Fc $\epsilon$ RI monoclonal antibodies

and N-formyl-methionine-leucyl-phenylalanine (fMLP) were used as positive controls, two blank determinations as negative controls (mean value shown in figure). For the pBHRA, the values are shown as histamine release in ng/ml exceeding the negative control. The colour scheme used is purely indicative.

**Table S3.** Concentrations of the allergen test solutions in µg/ml eliciting the highest histamine release in the aBHRA in WALDA patients.

| Patient | sIgE against<br>ω5-gliadin<br>(kU/l) | Gluten   | HMW-GS | ATI   | Alcohol-<br>free<br>wheat beer | eHWP      | sHWP       | Rye gluten | Rye<br>secalins |
|---------|--------------------------------------|----------|--------|-------|--------------------------------|-----------|------------|------------|-----------------|
| p 1     | 28.4                                 | 4000     | 4000   | 326.5 | 1:6430.7                       | 1:12.2    | 1:12.2     | 4000       | 0.04            |
| p 2     | 27.0                                 | 4000     | 4000   | 326.5 | 1:12.2                         | 1:525.2   | 1:275487.5 | 1142.9     | 26.5            |
| p 3     | 15.4                                 | 2.6      | 0.6    | 326.5 | 1:12.2                         | 1:78710.9 | 1:275487.5 | 0.6        | 0.04            |
| p 4     | 8.8                                  | not done |        |       |                                |           |            |            |                 |
| p 5     | 7.7                                  | 26.5     | 326.5  | 326.5 | 1:6430.7                       | 1:78710.9 | 1:1838.8   | 1142.9     | 2.6             |
| p 6     | 6.2                                  | 26.5     | 26.5   | 326.5 | 1:42.9                         | 1:12.2    | 1:6430.7   | 93.3       | 26.5            |
| p 7     | 5.4                                  | 26.5     | 1142.9 | 326.5 | 1:42.9                         | 1:22517.4 | 1:12.2     | 1142.9     | 26.5            |
| p 8     | 5.4                                  | 0.16     | 4000   | 326.5 | 1:12.2                         | 1:6430.7  | 1:12.2     | 7.6        | 0.16            |
| p 9     | 4.5                                  | 4000     | 4000   | 93.3  | 1:42.9                         | 1:12.2    | 1:12.2     | 93.3       | 7.6             |
| p 10    | 3.8                                  | 4000     | 4000   | 326.5 | 1:42.9                         | 1:12.2    | 1:12.2     | 4000       | 0.16            |
| p 11    | 3.6                                  | 4000     | 326.5  | 0.6   | 1:22517.4                      | 1:42.9    | 1:42.9     | 2.6        | 0.04            |
| p 12    | 2.4                                  | 4000     | 93.3   | 0.04  | 1:12.2                         | 1:12.2    | 1:12.2     | 4000       | 0.6             |
| p 13    | 2.3                                  | 93.3     | 93.3   | 93.3  | 1:12.2                         | 1:1838.8  | 1:12.2     | 1142.9     | 26.5            |

All concentrations are given in µg/ml. Abbreviations: ATI, α-amylase/trypsin inhibitors; HMW-GS, high-molecular-weight glutenin subunits; eHWP, extensively hydrolyzed wheat proteins; sHWP, slightly hydrolyzed wheat proteins; sIgE, specific IgE.

**Table S4.** Concentrations of allergen test substances with highest median histamine release in patients with WALDA in the aBHRA.

| Test substance in aBHRA | Concentration with highest<br>median histamine release | Median histamine release<br>(ng/ml) |
|-------------------------|--------------------------------------------------------|-------------------------------------|
| Gluten                  | 4000 µg/ml                                             | 25                                  |
| HMW-GS                  | 26.5 µg/ml                                             | 37.7                                |
| ATI                     | 93.3 µg/ml                                             | 18.4                                |
| Alcohol-free wheat beer | 1:12.2                                                 | 31                                  |
| eHWP                    | 1:42.9                                                 | 16.6                                |
| sHWP                    | 1:42.9                                                 | 29                                  |
| Rye secalins            | 0.6 µg/ml                                              | 24.3                                |
| Rye gluten              | 1142.9 µg/ml                                           | 17.9                                |

**Table S5.** Concentrations of allergen test substances with highest median histamine release in patients with WALDA in the pBHRA.

| Test substance in pBHRA | Concentration with highest median histamine release | Median histamine release (ng/ml exceeding the negative control) |
|-------------------------|-----------------------------------------------------|-----------------------------------------------------------------|
| Gluten                  | 3600 µg/ml                                          | 42.1                                                            |
| HMW-GS                  | 3600 µg/ml                                          | 48.8                                                            |
| ATI                     | 93.3 µg/ml                                          | 8.2                                                             |
| Alcohol-free wheat beer | 1:12.2                                              | 36.1                                                            |
| eHWP                    | 1:12.2                                              | 17.6                                                            |
| sHWP                    | 1:12.2                                              | 18.3                                                            |
| Rye secalins            | 84 µg/ml                                            | 6.8                                                             |

**Table S6.** Overview of the minimum concentration of test substances eliciting positive responses in WALDA patients.

| In vitro test                                                              | Test substance | Minimum concentration |
|----------------------------------------------------------------------------|----------------|-----------------------|
| <b>BAT</b><br>%CD63+ >5%                                                   | Gluten         | <800 µg/ml            |
|                                                                            | HMW-GS         | <800 µg/ml            |
|                                                                            | ATI            | 80 µg/ml              |
|                                                                            | Wheat beer     | <1:100                |
|                                                                            | eHWP           | <1:50                 |
|                                                                            | sHWP           | <1:50                 |
|                                                                            | Rye gluten     | <800 µg/ml            |
|                                                                            | Rye secalins   | <800 µg/ml            |
| <b>aBHRA</b><br>histamine release >10 ng/ml                                | Gluten         | <0.004 µg/ml          |
|                                                                            | HMW-GS         | <0.004 µg/ml          |
|                                                                            | ATI            | 0.2 µg/ml             |
|                                                                            | Wheat beer     | <1:964707             |
|                                                                            | eHWP           | <1:964707             |
|                                                                            | sHWP           | <1:964707             |
|                                                                            | Rye gluten     | <0.004 µg/ml          |
|                                                                            | Rye secalins   | <0.004 µg/ml          |
| <b>pBHRA</b><br>histamine release >10 ng/ml exceeding the negative control | Gluten         | 293 µg/ml             |
|                                                                            | HMW-GS         | 293 µg/ml             |
|                                                                            | ATI            | 293 µg/ml             |
|                                                                            | Wheat beer     | 1:525.2               |
|                                                                            | eHWP           | 1:12.2                |
|                                                                            | sHWP           | 1:150.1               |
|                                                                            | Rye secalins   | 0.2 µg/ml             |

BAT, basophil activation test; aBHRA, active basophil histamine release assay; pBHRA, passive basophil histamine release assay; ATI,  $\alpha$ -amylase/trypsin inhibitors; HMW-GS, high-molecular-weight glutenin subunits; eHWP, extensively hydrolyzed wheat proteins; sHWP, slightly hydrolyzed wheat proteins.
